# Supplementary figures and images for: Gene duplication is associated with gene diversification and potential neofunctionalization in lung cancer evolution
Source: HighWire-hosted journal article supplement (doi:10.1101/gr.278663.123), 2026-02-19

# LUAD sample coverage – FIE

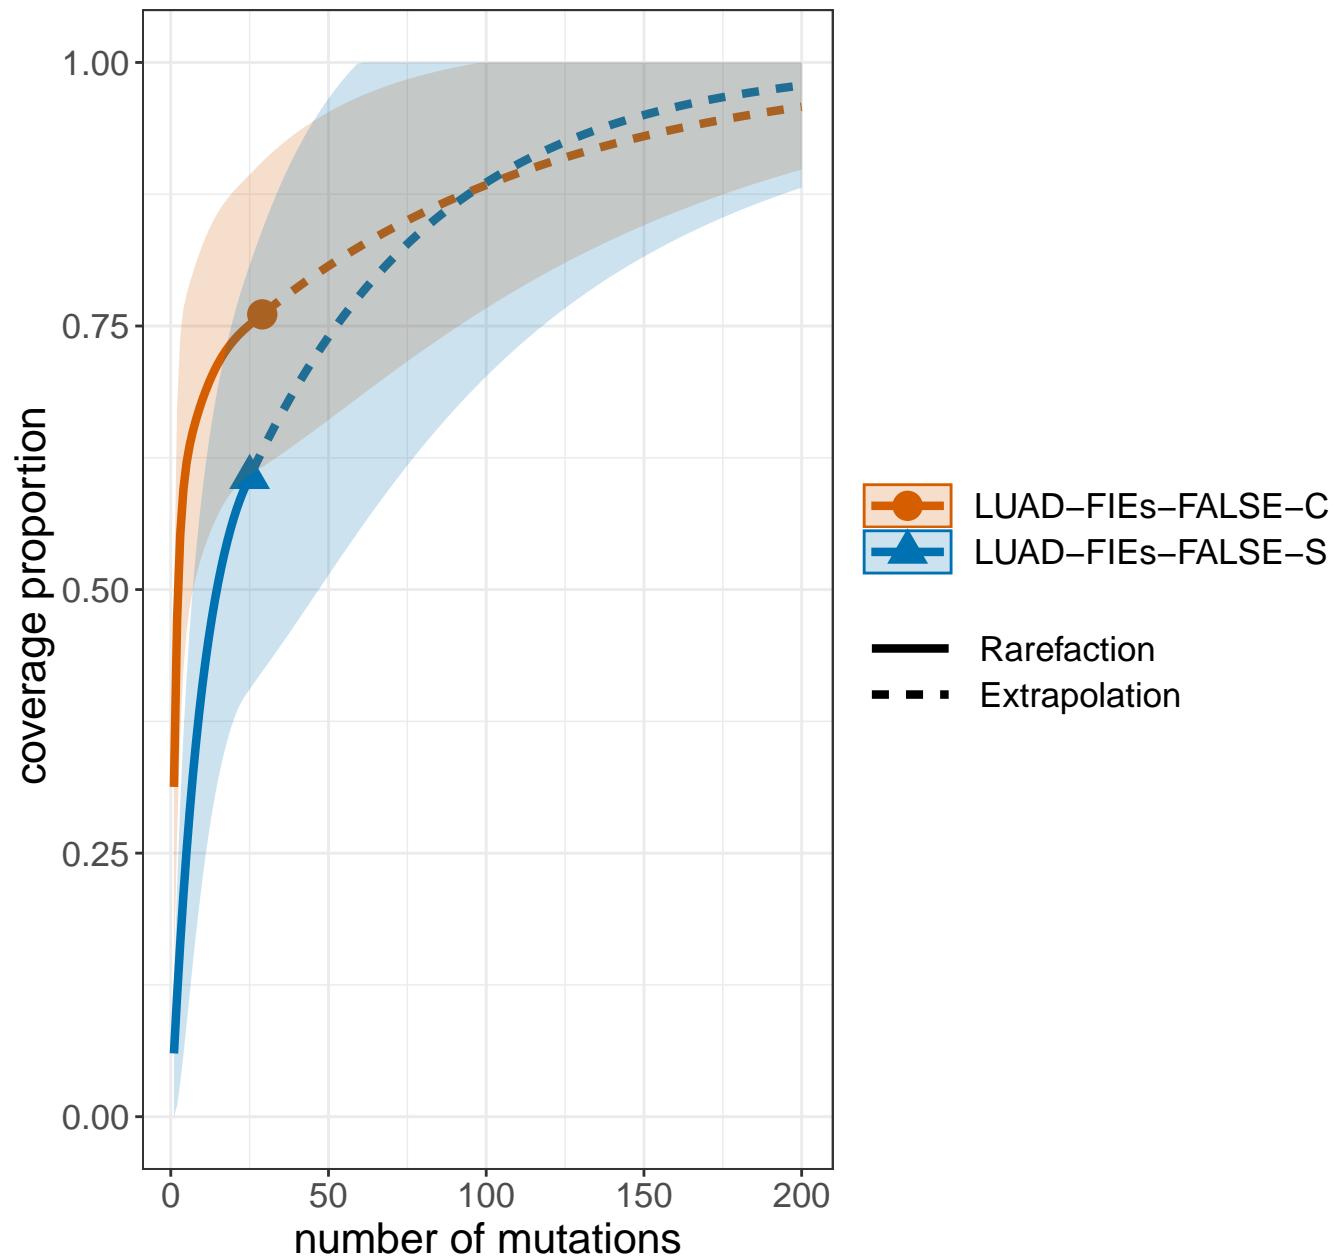

Supplement: Supplemental_Code_1.zip [file plot_diversity_diversity_yj07f_full_table_gene.csv_duplicated-clonality_duponly_FALSE_q_1_knots_200_nboot_2000_simpler_labels_TRUE_FIE_LUAD_txp_N_conf_0.95_plot_sampcompleteness.pdf › funvar-tracerx-main/script/diversity_analysis/working/plot_diversity_diversity_yj07f_full_table_gene.csv_duplicated-clonality_duponly_FALSE_q_1_knots_200_nboot_2000_simpler_labels_TRUE_FIE_LUAD_txp_N_conf_0.95_plot_sampcompleteness.pdf]

# LUAD sample coverage – FIE

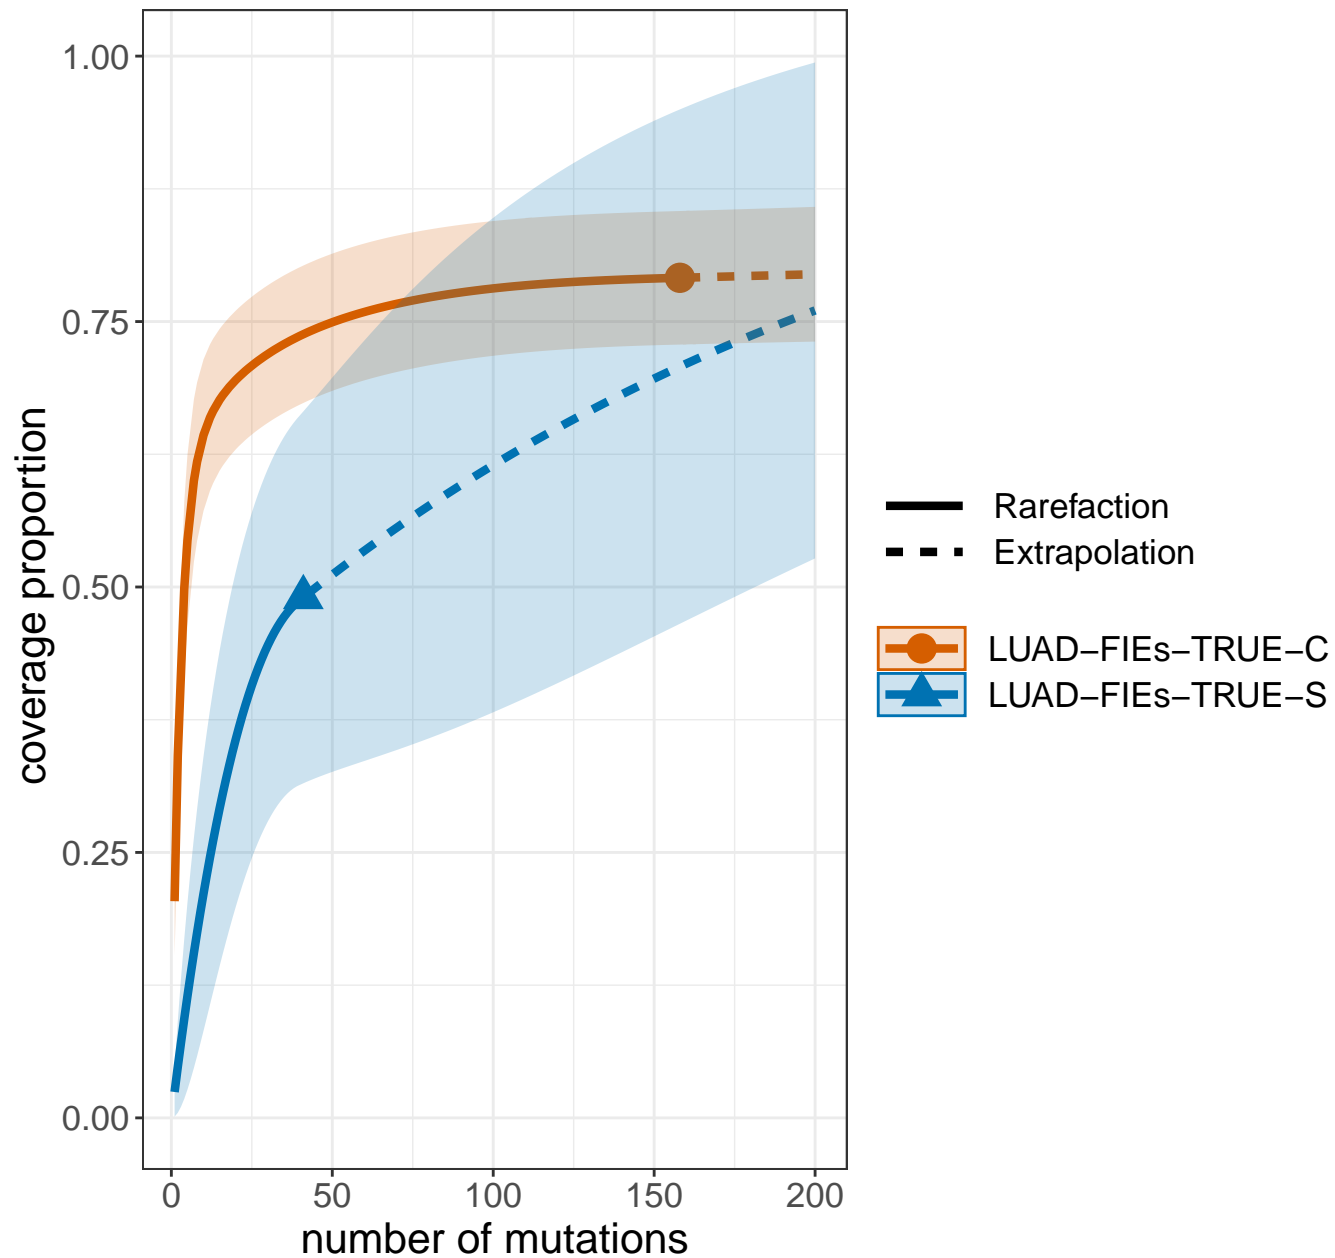

Supplement: Supplemental_Code_1.zip [file plot_diversity_diversity_yj07f_full_table_gene.csv_duplicated-clonality_duponly_TRUE_q_1_knots_200_nboot_2000_simpler_labels_TRUE_FIE_LUAD_txp_N_conf_0.95_plot_sampcompleteness.pdf › funvar-tracerx-main/script/diversity_analysis/working/plot_diversity_diversity_yj07f_full_table_gene.csv_duplicated-clonality_duponly_TRUE_q_1_knots_200_nboot_2000_simpler_labels_TRUE_FIE_LUAD_txp_N_conf_0.95_plot_sampcompleteness.pdf]

# LUAD sample coverage – FIE

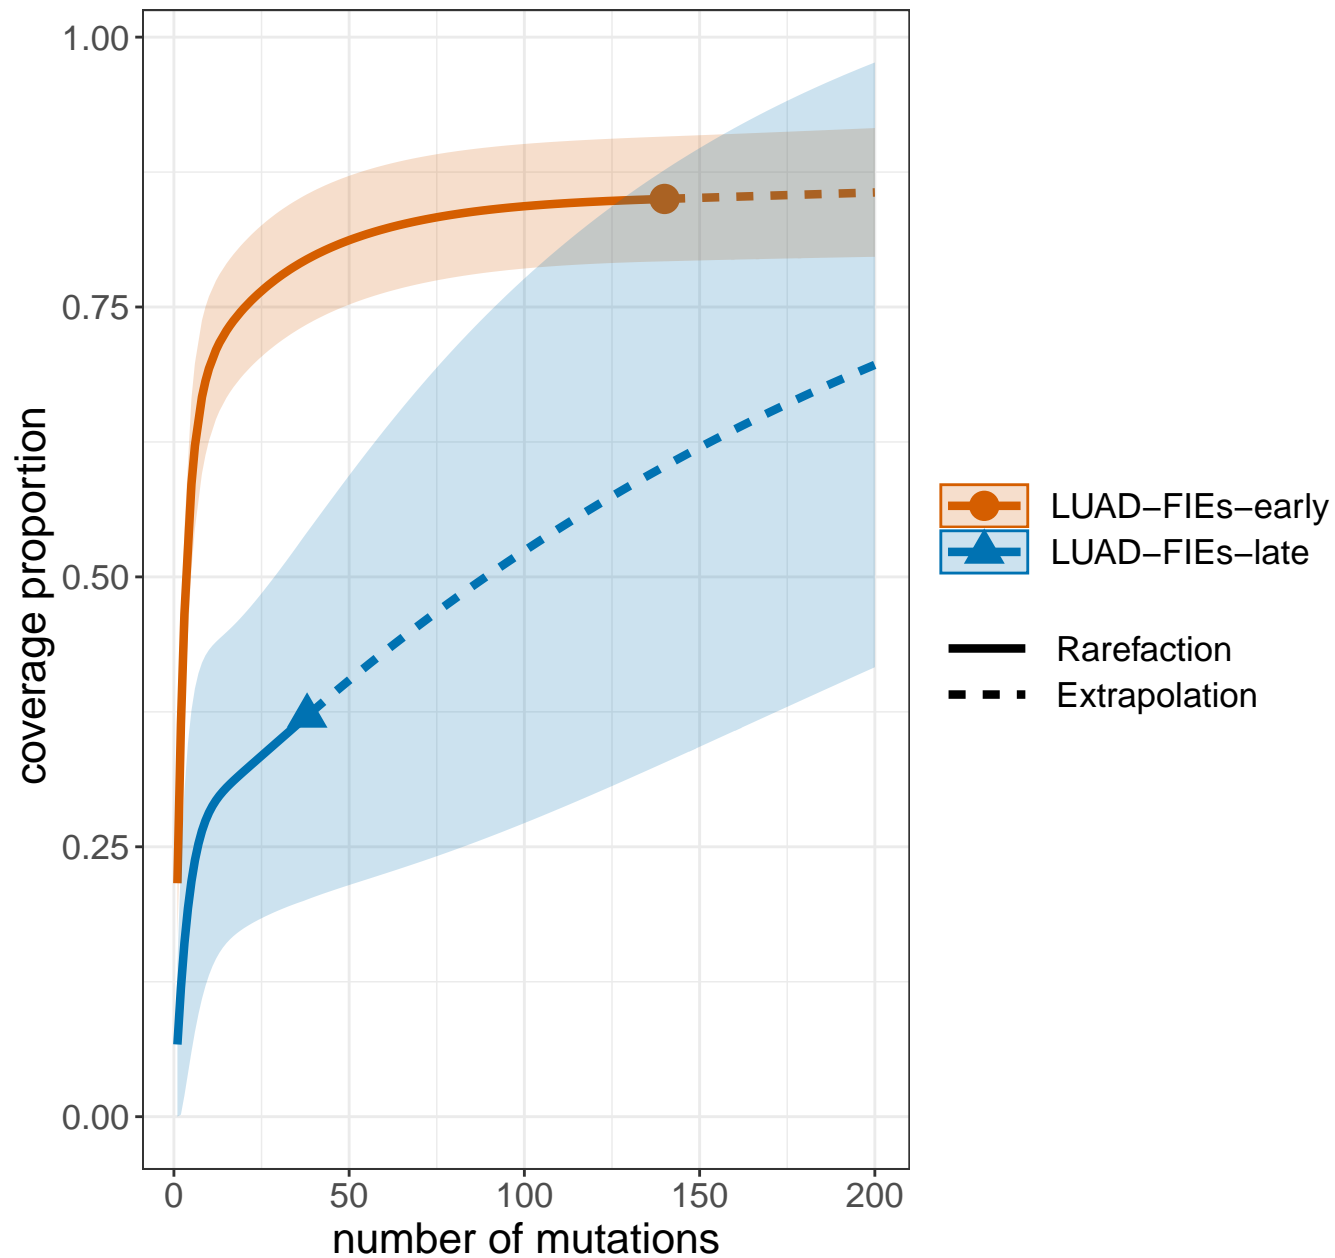

Supplement: Supplemental_Code_1.zip [file plot_diversity_diversity_yj07f_full_table_gene.csv_timing_q_1_knots_200_nboot_2000_simpler_labels_TRUE_FIE_LUAD_txp_N_conf_0.95_plot_sampcompleteness.pdf › funvar-tracerx-main/script/diversity_analysis/working/plot_diversity_diversity_yj07f_full_table_gene.csv_timing_q_1_knots_200_nboot_2000_simpler_labels_TRUE_FIE_LUAD_txp_N_conf_0.95_plot_sampcompleteness.pdf]
